# Supplementary material for: Ozonized Oleic Acid as a New Viticultural Treatment? Study of the Effect of LIQUENSO® Oxygenate on the Carpoplane Microbial Community and Wine Microorganisms Combining Metabarcoding and In Vitro Assays
Source: MDPI journal article supplement (doi:10.3390/ecologies3030023), 2022-07-29
Supplement: s1 [file s1]

## Supplemental Material

# Ozonized Oleic Acid as a New Viticultural Treatment? Study of the Effect of LIQUENSO® Oxygenate on the Carpoplane Microbial Community and Wine Microorganisms Combining Metabarcoding and *In Vitro* Assays

Lea Franziska Stahl <sup>1,2</sup>, Manon Edo <sup>4</sup>, Timon Nonnenmacher <sup>3</sup>, Daniela Reif <sup>4</sup>, Friederike Rex <sup>4</sup>, Pascal Wegmann-Herr <sup>4</sup>, Andreas Kortekamp <sup>5</sup>, Jochen Fischer-Schuch <sup>6</sup>, Eckhard Thines <sup>2,6</sup> and Maren Scharfenberger-Schmeer <sup>1,4\*</sup>

<sup>1</sup> Faculty of Applied Logistics and Polymer Sciences, University of Applied Sciences Kaiserslautern, 67659 Kaiserslautern, GE; as a member of the Wine Campus Neustadt, 67435 Neustadt, GE; leafstahl@gmail.com (L.F.S.);

<sup>2</sup> Microbiology and Wine Research, Institute for Molecular Physiology, Johannes-Gutenberg University Mainz, 55128 Mainz, GE; thines@uni-mainz.de

<sup>3</sup> Anseros Klaus-Nonnenmacher GmbH, 72070 Tübingen, GE; timon.nonnenmacher@anseros.de (T.N.)

<sup>4</sup> Institute for Viticulture and Oenology, State Education and Research Center of Viticulture and Horticulture and Rural Development (DLR) Rheinpfalz, 67435 Neustadt, GE; daniela.reif@dlr.rlp.de (D.R.); friederike.rex@dlr.rlp.de (F.R.); pascal.wegmann-herr@dlr.rlp.de (P.W.-H.) manon.edo@laposte.net (M.E.)

<sup>5</sup> Institute for Plant Protection, State Education and Research Center of Viticulture and Horticulture and Rural Development (DLR) Rheinpfalz, 67435 Neustadt, GE; andreas.kortekamp@dlr.rlp.de

<sup>6</sup> IBWF gGmbH, Institute for Biotechnology and Drug Research, 55128 Mainz, GE; fischer@ibwf.de

\* Correspondence: mmaren.ScharfenbergerSchmeer@hs-kl.de

**Table S1** : Schedule of phytosanitary treatments in the vineyard of the grape variety *Vitis vinifera* L. cv. Portugieser carried out in the season from 29 April 2019 to 10 September 2019. Application of fungicides followed the local recommendations of the plant protection service (DLR Rheinpfalz). Ozonide was applied at a concentration of 0,8% (v/v). The vineyard is located in Neustadt (Weinstraße), DE (49°22'28.2"N 8°11'28.3"E).

| Date       | NT | CT                                                                                              | OT                      |
|------------|----|-------------------------------------------------------------------------------------------------|-------------------------|
| 29.04.2019 | -  | -                                                                                               | ozonide <sup>(7)</sup>  |
| 06.05.2019 | -  | Netzschwefel Stulln <sup>(1)</sup> , Folpan® 80 WDG <sup>(2)</sup> , Polyram® WG <sup>(3)</sup> | ozonide <sup>(7)</sup>  |
| 13.05.2019 | -  | -                                                                                               | ozonide <sup>(7)</sup>  |
| 16.05.2019 | -  | Dynali <sup>(6)</sup> , Folpan® 80 WDG <sup>(2)</sup>                                           | -                       |
| 20.05.2019 | -  | -                                                                                               | ozonide <sup>(7)</sup>  |
| 27.05.2019 | -  | Folpan® 80 WDG <sup>(2)</sup> , Talendo® <sup>(4)</sup>                                         | -                       |
| 28.05.2019 | -  | -                                                                                               | ozonide <sup>(7)</sup>  |
| 03.06.2019 | -  | -                                                                                               | ozonide <sup>(7)</sup>  |
| 05.06.2019 | -  | Folpan® 80 WDG <sup>(2)</sup> , Talendo® <sup>(4)</sup>                                         | -                       |
| 10.06.2019 | -  | -                                                                                               | ozonide <sup>(7)</sup>  |
| 18.06.2019 | -  | Folpan® 80 WDG <sup>(2)</sup> , Luna® Experience <sup>(5)</sup>                                 | ozonide <sup>(11)</sup> |
| 24.06.2019 | -  | -                                                                                               | ozonide <sup>(7)</sup>  |

|            |         |                                                                   |                        |
|------------|---------|-------------------------------------------------------------------|------------------------|
| 26.06.2019 | -       | Folpan® 80 WDG <sup>(2)</sup> , Vivando® <sup>(3)</sup>           | -                      |
| 01.07.2019 | -       | -                                                                 | ozonide <sup>(7)</sup> |
| 08.07.2019 | -       | Folpan® 80 WDG <sup>(2)</sup> , Sercardis® <sup>(3)</sup>         | ozonide <sup>(7)</sup> |
| 15.07.2019 | -       | -                                                                 | ozonide <sup>(7)</sup> |
| 17.07.2019 | -       | Folpan® 80 WDG <sup>(2)</sup> , Dynali <sup>(6)</sup>             | -                      |
| 22.07.2019 | -       | -                                                                 | ozonide <sup>(7)</sup> |
| 29.07.2019 | -       | Folpan® 80 WDG <sup>(2)</sup> , Systhane™ 20 EW <sup>(4)</sup>    | ozonide <sup>(7)</sup> |
| 05.08.2019 | -       | -                                                                 | ozonide <sup>(7)</sup> |
| 12.08.2019 | -       | Funguran®progress <sup>(1)</sup> , Systhane™ 20 EW <sup>(4)</sup> | -                      |
| 10.09.2019 | HARVEST |                                                                   |                        |

<sup>(1)</sup> Biofa GmbH, Münsingen, DE

<sup>(2)</sup> ADAMA Deutschland GmbH, Cologne, DE

<sup>(3)</sup> BASF SE, Ludwigshafen, DE

<sup>(4)</sup> Corteva Agriscience Germany GmbH, Munich, DE

<sup>(5)</sup> Bayer CropScience Deutschland GmbH, Langenfeld, DE

<sup>(6)</sup> Syngenta Agro GmbH, Maintal, DE

<sup>(7)</sup> Anseros Klaus-Nonnenmacher GmbH, Tübingen, DE

**Table S2:** Organisms used for 96-well microtiter-based efficacy assays and the incubation time to final photometric measurement of OD<sub>600</sub>.

| Species                                                                                                 | Strain                           | Final measurement |
|---------------------------------------------------------------------------------------------------------|----------------------------------|-------------------|
| <i>Acetobacter aceti</i> subsp. <i>aceti</i>                                                            | <sup>(1)</sup> DSM 3508          | 3 d.p.i.          |
| <i>Gluconobacter oxydans</i>                                                                            | <sup>(3)</sup> DLR-Isolate Bac31 | 8 d.p.i.          |
| <i>Levilactobacillus brevis</i> (Basonym: <i>Lactobacillus brevis</i> )                                 | <sup>(1)</sup> DSM 1268          | 1 d.p.i.          |
| <i>Lactiplantibacillus plantarum</i> subsp. <i>plantarum</i> (Basonym: <i>Lactobacillus plantarum</i> ) | <sup>(1)</sup> DSM 20205         | 1 d.p.i.          |
| <i>Oenococcus oeni</i>                                                                                  | <sup>(1)</sup> DSM 20255         | 6 d.p.i.          |
| <i>Pediococcus</i> sp.                                                                                  | <sup>(1)</sup> DSM 1056          | 1 d.p.i.          |
| <i>Brettanomyces bruxellensis</i>                                                                       | <sup>(2)</sup> AWRI 1499         | 1 d.p.i.          |
| <i>Candida zeylanoides</i>                                                                              | <sup>(1)</sup> DSM 70185         | 1 d.p.i.          |
| <i>Hanseniaspora uvarum</i>                                                                             | <sup>(3)</sup> DLR-Isolate Y1    | 1 d.p.i.          |
| <i>Metschnikowia pulcherrima</i>                                                                        | <sup>(1)</sup> DSM 70321         | 1 d.p.i.          |
| <i>Pichia fermentans</i>                                                                                | <sup>(1)</sup> DSM 70090         | 1 d.p.i.          |
| <i>Saccharomyces cerevisiae</i>                                                                         | <sup>(4)</sup> Uvaferm 228       | 1 d.p.i.          |
| <i>Schizosaccharomyces pombe</i> var. <i>pombe</i>                                                      | <sup>(1)</sup> DSM 70572         | 1 d.p.i.          |
| <i>Zygosaccharomyces bailii</i>                                                                         | <sup>(1)</sup> DSM 70492         | 1 d.p.i.          |

<sup>(1)</sup> Leibniz institute, DSMZ-German Collection of Microorganism and Cell Cultures GmbH, Braunschweig, DE

<sup>(2)</sup> AWRI-Australian Wine Research Institute, Adelaide, AU

<sup>(3)</sup> Field isolates from German vineyards, reviewed and confirmed by sequencing

<sup>(4)</sup> Lallemand S.A.S., Montreal, CA

**Table S3 :** Species share of the individual samples in one triplicate of the same category expressed as percent of bacterial organisms (*Proteobacteria*, *Pantoea* spp., *Acetobacter* spp., *Lactobacillus* spp. and *Pseudomonas syringae*) or percent of fungal organisms (*Ascomycota*, *Basidiomycota*) respectively.

|                        | Proteobacteria | <i>Pantoea</i><br>spp. | <i>Acetobacter</i><br>spp. | <i>Lactobacillus</i><br>spp. | <i>Pseudomonas</i><br><i>syringae</i> | Ascomycota | Basidiomycota |
|------------------------|----------------|------------------------|----------------------------|------------------------------|---------------------------------------|------------|---------------|
| Portugieser I<br>(NT)  | 98             | 90                     | 0                          | 0                            | 5                                     | 94         | 6             |
|                        | 81             | 70                     | 0                          | 0                            | 2                                     | 94         | 5             |
|                        | 80             | 53                     | 0                          | 0,4                          | 3                                     | 90         | 10            |
| Portugieser I<br>(CT)  | 99             | 90                     | 0,2                        | 0                            | 7                                     | 92         | 8             |
|                        | 85             | 34                     | 0                          | 0,02                         | 3                                     | 89         | 11            |
|                        | 99             | 93                     | 0                          | 0                            | 0,6                                   | 84         | 16            |
| Portugieser I<br>(OT)  | 99             | 94                     | 0,01                       | 0                            | 4                                     | 93         | 6             |
|                        | 69             | 66                     | 0                          | 0                            | 1                                     | 89         | 10            |
|                        | 99             | 96                     | 0,02                       | 0                            | 2                                     | 89         | 11            |
| Portugieser<br>II (NT) | 42             | 18                     | 0                          | 0                            | 0,8                                   | 90         | 8             |
|                        | 66             | 3                      | 0                          | 0                            | 0,08                                  | 69         | 18            |
|                        | 75             | 64                     | 0,01                       | 0                            | 0,06                                  | 81         | 13            |
| Portugieser<br>II (CT) | 77             | 62                     | 0                          | 0                            | 0,4                                   | 65         | 32            |
|                        | 50             | 8                      | 0                          | 0                            | 0,4                                   | 13         | 87            |
|                        | 63             | 29                     | 0                          | 0                            | 0,3                                   | 19         | 80            |
| Portugieser<br>II (OT) | 82             | 79                     | 0                          | 0                            | 0,2                                   | 79         | 21            |
|                        | 53             | 47                     | 0                          | 0                            | 0,4                                   | 76         | 23            |
|                        | 64             | 38                     | 0                          | 0                            | 0,1                                   | 84         | 15            |

**Table S4:** In vitro efficacy analysis of non-ozonized oleic acid. All values and standard deviations are expressed in % related to the corresponding negative controls (Table 3). Values significantly deviating from the corresponding C- ( $p < 0,05$ ) are greyed.

|                                      | 0,25%<br>(v/v)<br>oleic<br>acid | 0,4 %<br>(v/v)<br>oleic<br>acid | 0,8%<br>(v/v)<br>oleic<br>acid | 1,6 %<br>(v/v)<br>oleic<br>acid | 2,5 %<br>(v/v)<br>oleic<br>acid | 5 %<br>(v/v)<br>oleic<br>acid | C-           | C+        |
|--------------------------------------|---------------------------------|---------------------------------|--------------------------------|---------------------------------|---------------------------------|-------------------------------|--------------|-----------|
| <i>Acetobacter aceti</i>             | 95.0 ± 4.6                      | 99.3 ± 2.4                      | 97.8 ± 3.5                     | 96.4 ± 4.6                      | 96.0 ± 9.3                      | 92.0 ± 1.4                    | 100.0 ± 3.2  | 0.0 ± 5.1 |
| <i>Gluconobacter oxydans</i>         | 166.0 ± 20.6                    | 140.0 ± 20.5                    | 145.5 ± 10.4                   | 149.0 ± 25.9                    | 198.8 ± 64.8                    | 140.7 ± 22.7                  | 100.0 ± 17.0 | 0.0 ± 8.8 |
| <i>Levilactobacillus brevis</i>      | 114.4 ± 6.4                     | 107.0 ± 5.6                     | 109.6 ± 4.7                    | 112.5 ± 3.7                     | 101.0 ± 5.5                     | 77.2 ± 36.2                   | 100.0 ± 9.1  | 0.0 ± 2.5 |
| <i>Lactiplantibacillus plantarum</i> | 109.2 ± 1.3                     | 109.8 ± 5.9                     | 109.7 ± 1.8                    | 108.6 ± 1.6                     | 104.7 ± 3.0                     | 103.0 ± 2.4                   | 100.0 ± 4.5  | 0.0 ± 1.7 |
| <i>Oenococcus oeni</i>               | 147.0 ± 5.9                     | 162.3 ± 43.5                    | 139.6 ± 5.9                    | 135.8 ± 1.1                     | 131.1 ± 2.6                     | 129.7 ± 6.5                   | 100.0 ± 4.2  | 0.0 ± 3.5 |
| <i>Pediococcus sp.</i>               | 93.1 ± 2.5                      | 86.4 ± 8.9                      | 84.4 ± 5.2                     | 88.0 ± 0.5                      | 85.4 ± 9.1                      | 18.7 ± 2.7                    | 100.0 ± 6.4  | 0.0 ± 3.6 |
| <i>Brettanomyces bruxellensis</i>    | 105.6 ± 12.6                    | 112.2 ± 17.2                    | 113.4 ± 8.9                    | 126.3 ± 37.2                    | 122.2 ± 8.5                     | 122.1 ± 11.1                  | 100.0 ± 13.8 | 0.0 ± 2.3 |
| <i>Candida zeylanoides</i>           | 105.2 ± 3.8                     | 135.2 ± 15.0                    | 116.1 ± 12.0                   | 105.5 ± 7.4                     | 101.1 ± 13.0                    | 97.9 ± 18.6                   | 100.0 ± 27.7 | 0.0 ± 3.5 |
| <i>Hanseniaspora uvarum</i>          | 100.6 ± 5.8                     | 94.9 ± 1.5                      | 92.7 ± 6.3                     | 97.8 ± 5.4                      | 95.7 ± 3.8                      | 93.8 ± 0.5                    | 100.0 ± 7.6  | 0.0 ± 5.9 |
| <i>Metschnikowia pulcherrima</i>     | 98.7 ± 2.9                      | 103.2 ± 3.4                     | 99.4 ± 1.7                     | 96.3 ± 4.0                      | 98.3 ± 4.4                      | 96.9 ± 3.0                    | 100.0 ± 3.3  | 0.0 ± 1.5 |
| <i>Pichia fermentans</i>             | 103.6 ± 0.8                     | 107.1 ± 2.1                     | 104.4 ± 1.7                    | 103.4 ± 2.4                     | 105.0 ± 4.3                     | 101.9 ± 8.8                   | 100.0 ± 2.8  | 0.0 ± 0.6 |

|                                  |             |              |             |              |             |             |              |           |
|----------------------------------|-------------|--------------|-------------|--------------|-------------|-------------|--------------|-----------|
| <i>Saccharomyces cerevisiae</i>  | 97.4 ± 5.0  | 107.2 ± 4.7  | 105.3 ± 4.4 | 103.1 ± 4.8  | 108.0 ± 4.1 | 108.0 ± 3.9 | 100.0 ± 3.1  | 0.0 ± 1.0 |
| <i>Schizosaccharomyces pombe</i> | 95.0 ± 0.7  | 99.6 ± 6.7   | 101.3 ± 6.1 | 87.2 ± 6.6   | 104.3 ± 2.0 | 103.1 ± 2.9 | 100.0 ± 2.9  | 0.0 ± 3.6 |
| <i>Torulaspora delbruckii</i>    | 98.1 ± 5.1  | 100.2 ± 4.6  | 91.2 ± 5.6  | 101.7 ± 3.9  | 102.1 ± 3.9 | 102.6 ± 5.4 | 100.0 ± 2.2  | 0.0 ± 1.1 |
| <i>Zygosaccharomyces bailii</i>  | 110.5 ± 7.8 | 114.9 ± 10.1 | 112.8 ± 7.9 | 116.2 ± 14.8 | 115.7 ± 7.8 | 127.0 ± 4.8 | 100.0 ± 43.4 | 0.0 ± 1.2 |

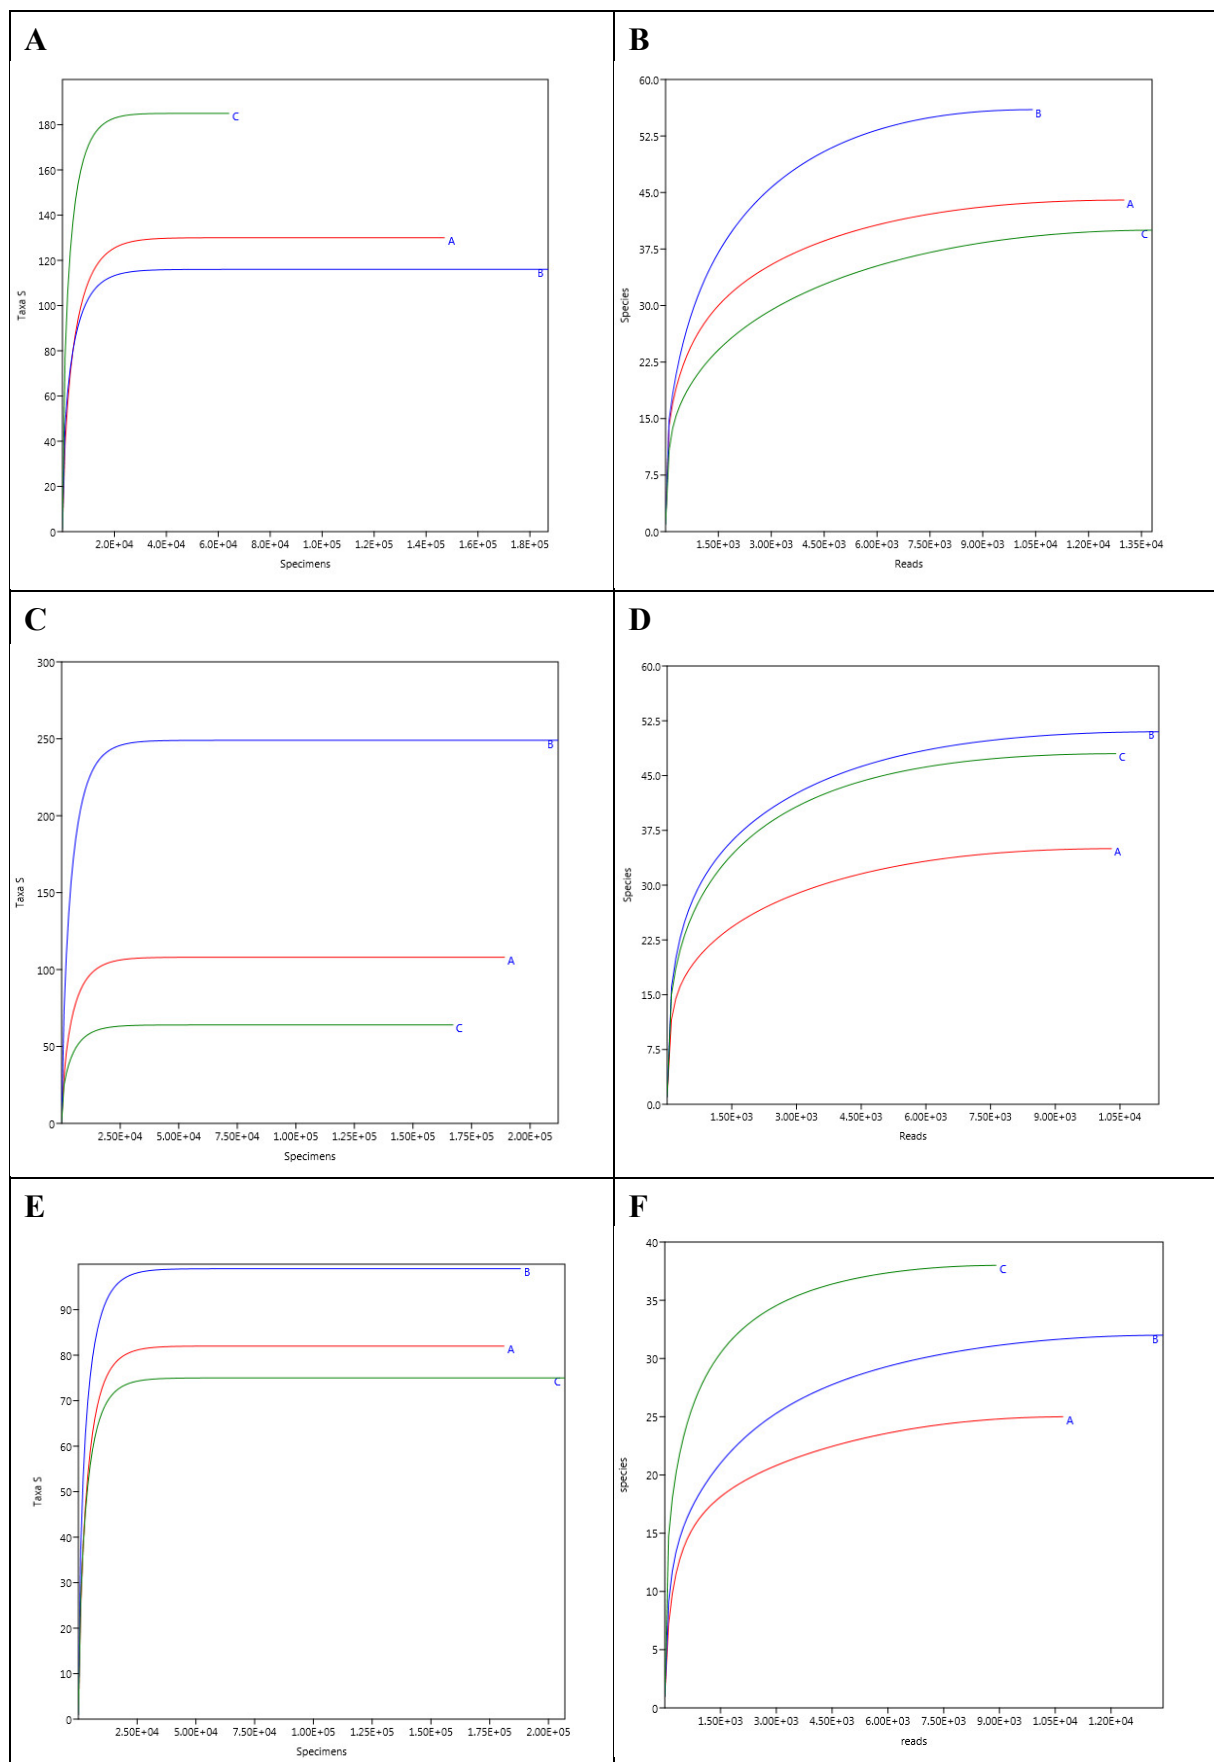

**Figure S1:** Rarefaction curves obtained from 16S sequencing. Portugieser carpoplane sample triplicates of category I NT (A), CT (C) and OT (E) and category II NT (B), CT (D) and OT (F).

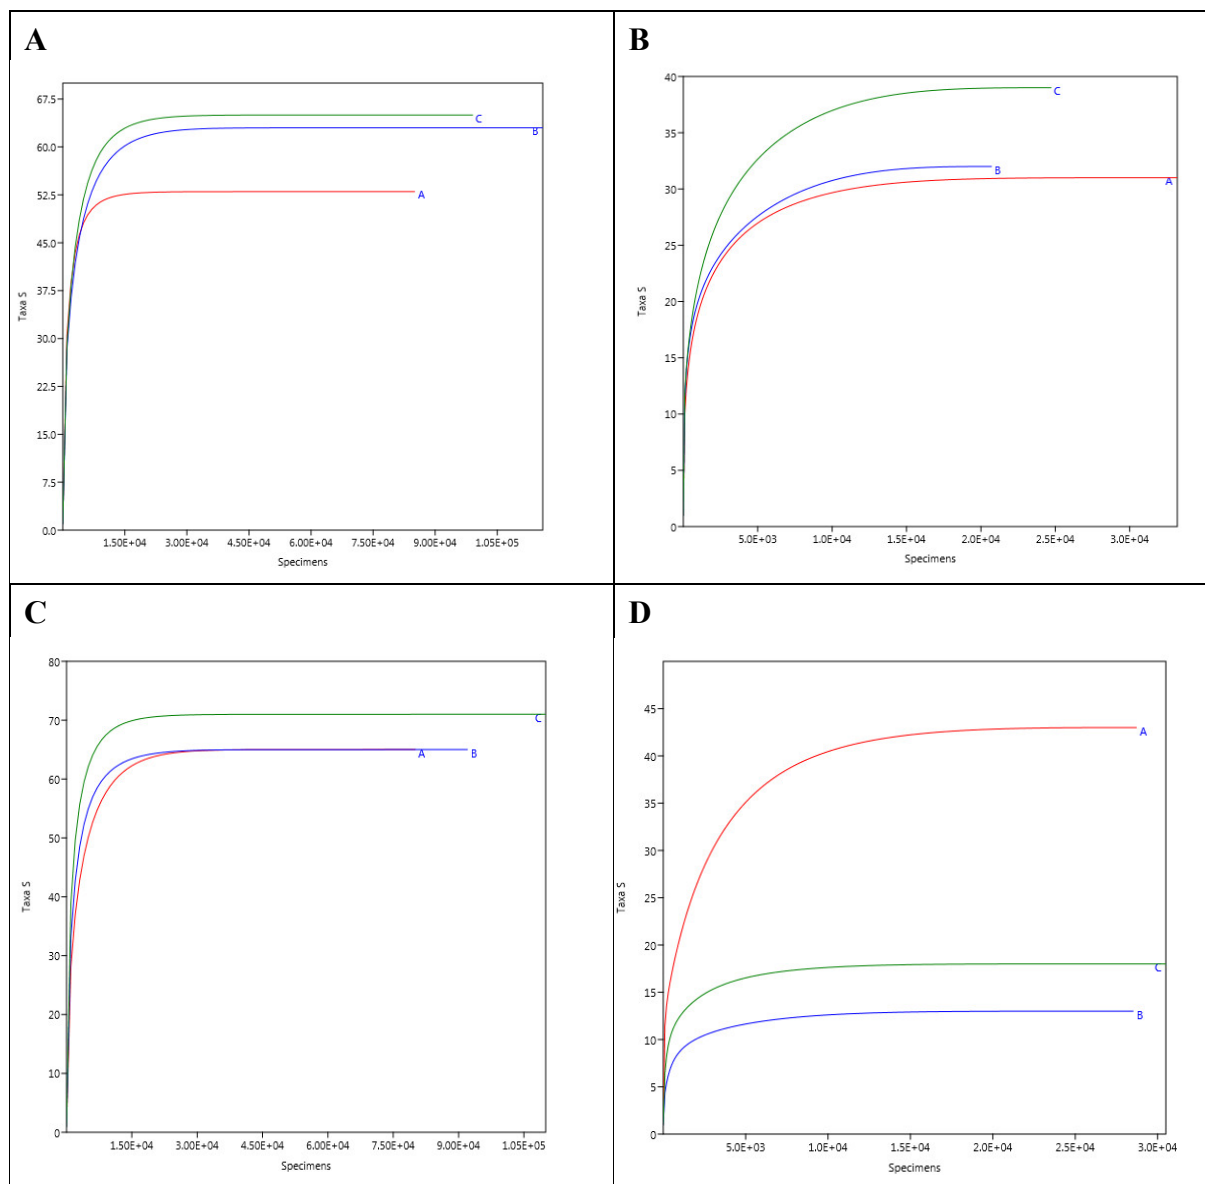

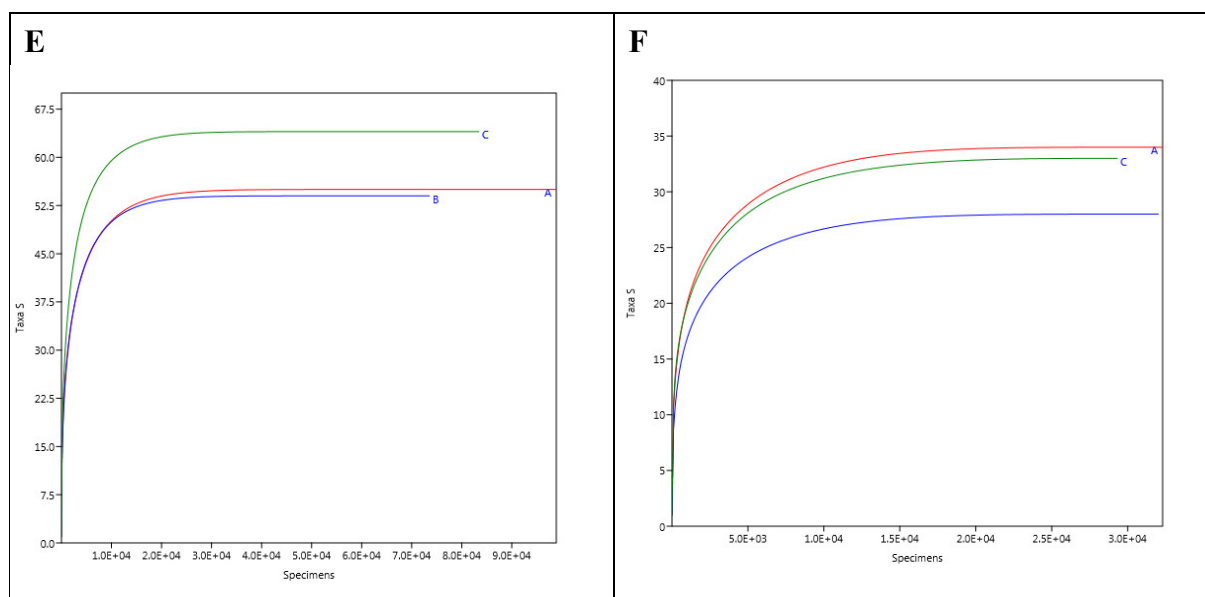

**Figure S2 :** Rarefaction curves obtained from ITS2 sequencing. Portugieser carpoplane sample triplicates of category I NT (A), CT (C) and OT (E) and category II NT (B), CT (D) and OT (F).

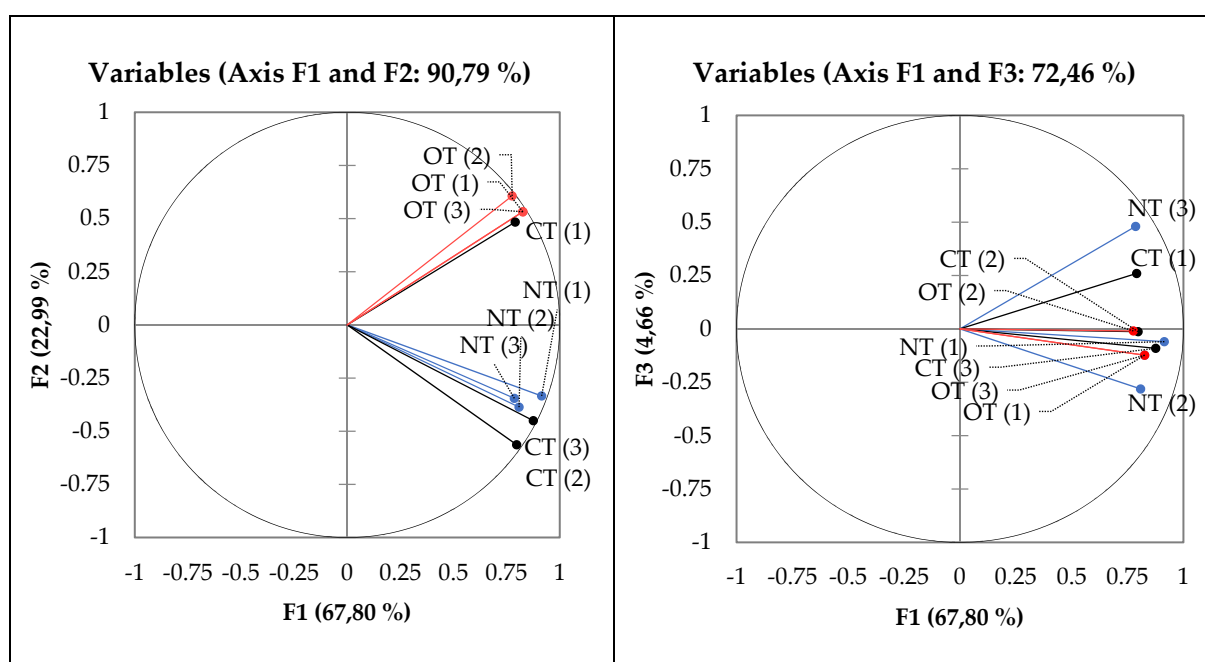

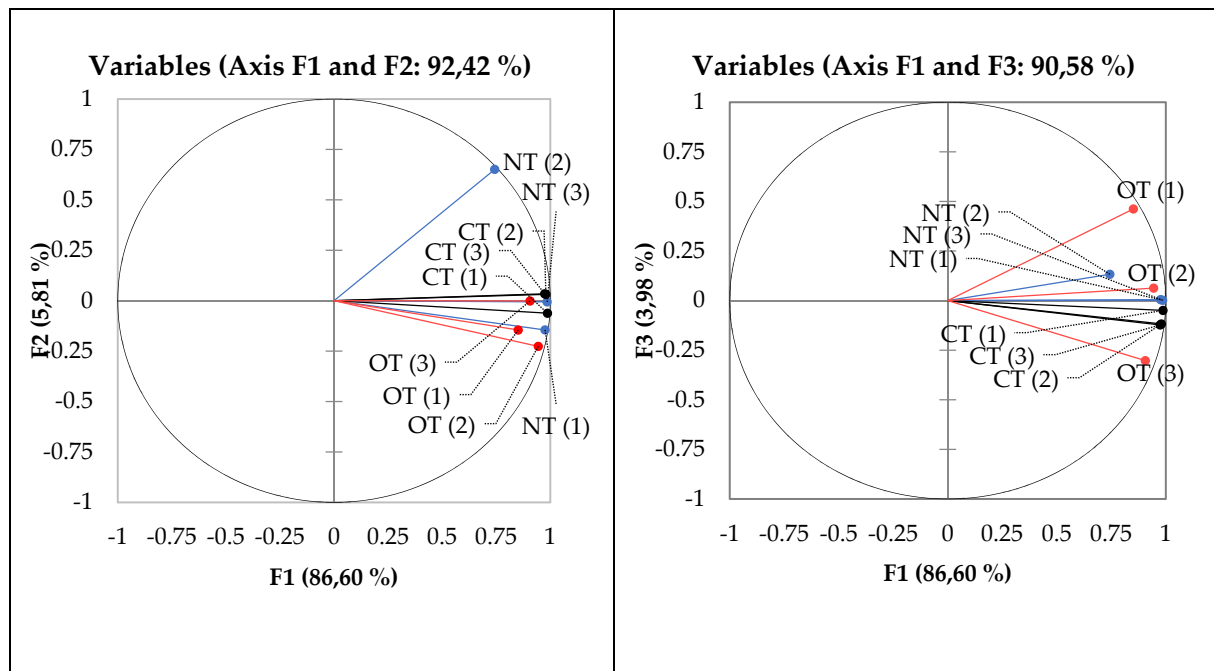

**Figure S3:** Principal Component Analysis of Portugieser I-16S (top) and Portugieser II-16S (bottom). The correlation circles represent Spearman's Rank correlations ( $p < 0,05$ ) of individual samples. Sample types are color coded: NT=blue, OT=red, CT=black.

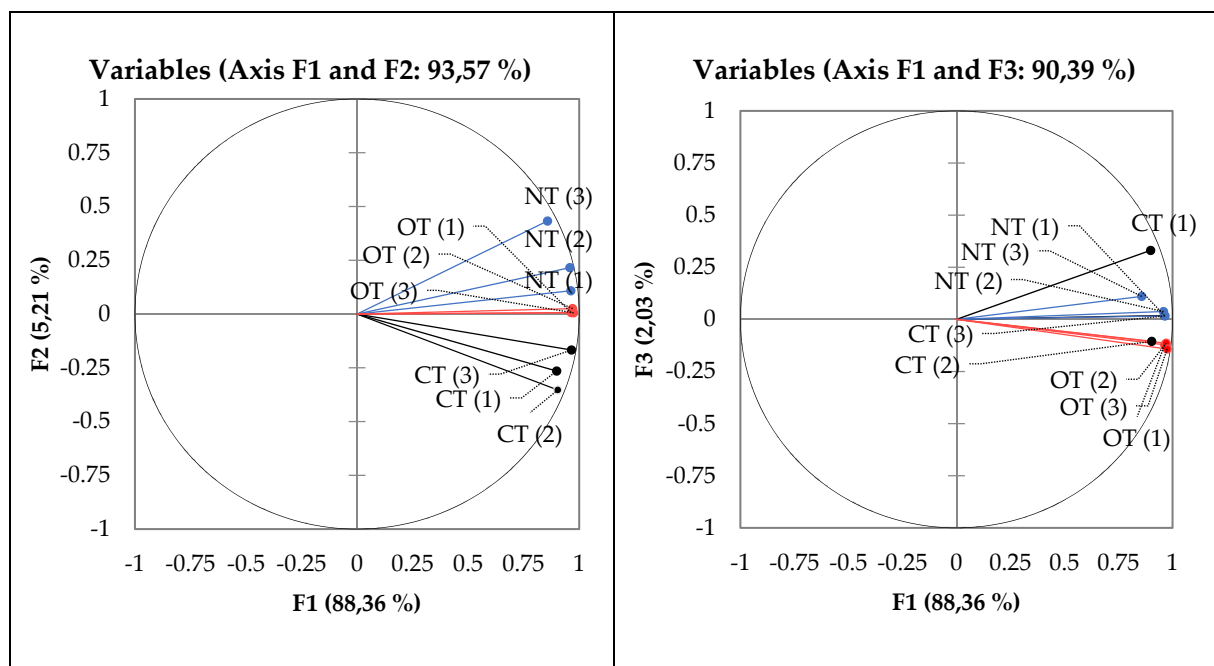



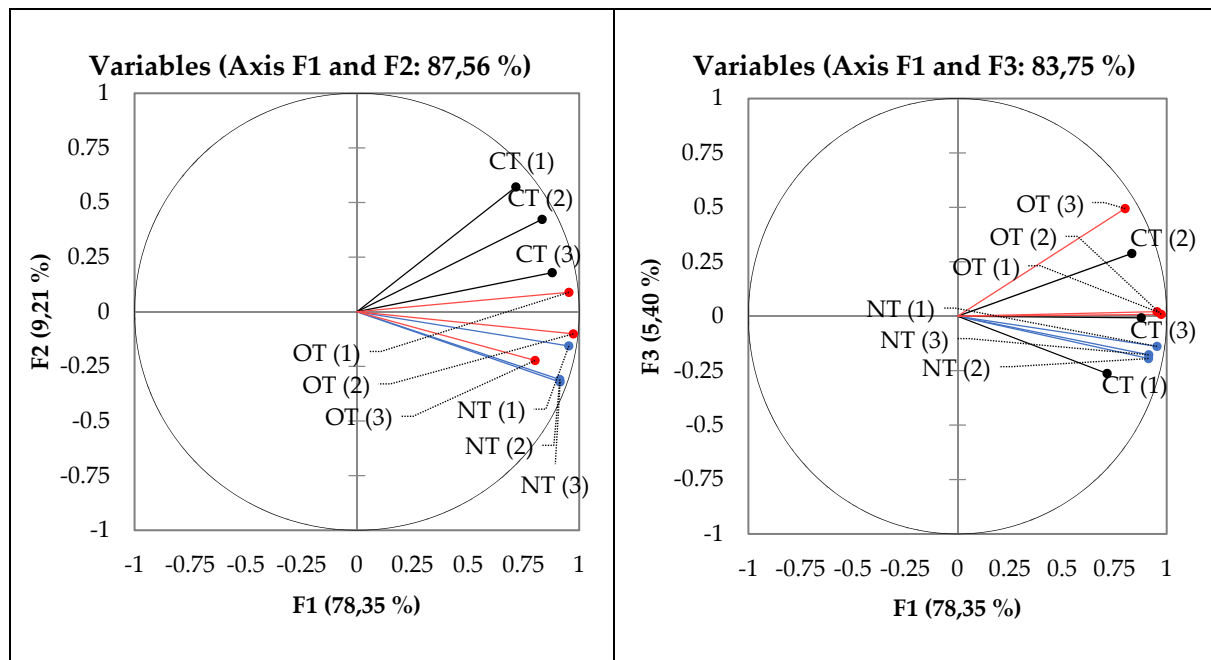

**Figure S4:** Principal Component Analysis of Portugieser I-ITS2 (top) and Portugieser II-ITS2 (bottom). The correlation circles represent Spearman's Rank correlations ( $p < 0,05$ ) of individual samples. Sample types are color coded: NT=blue, OT=red, CT=black.

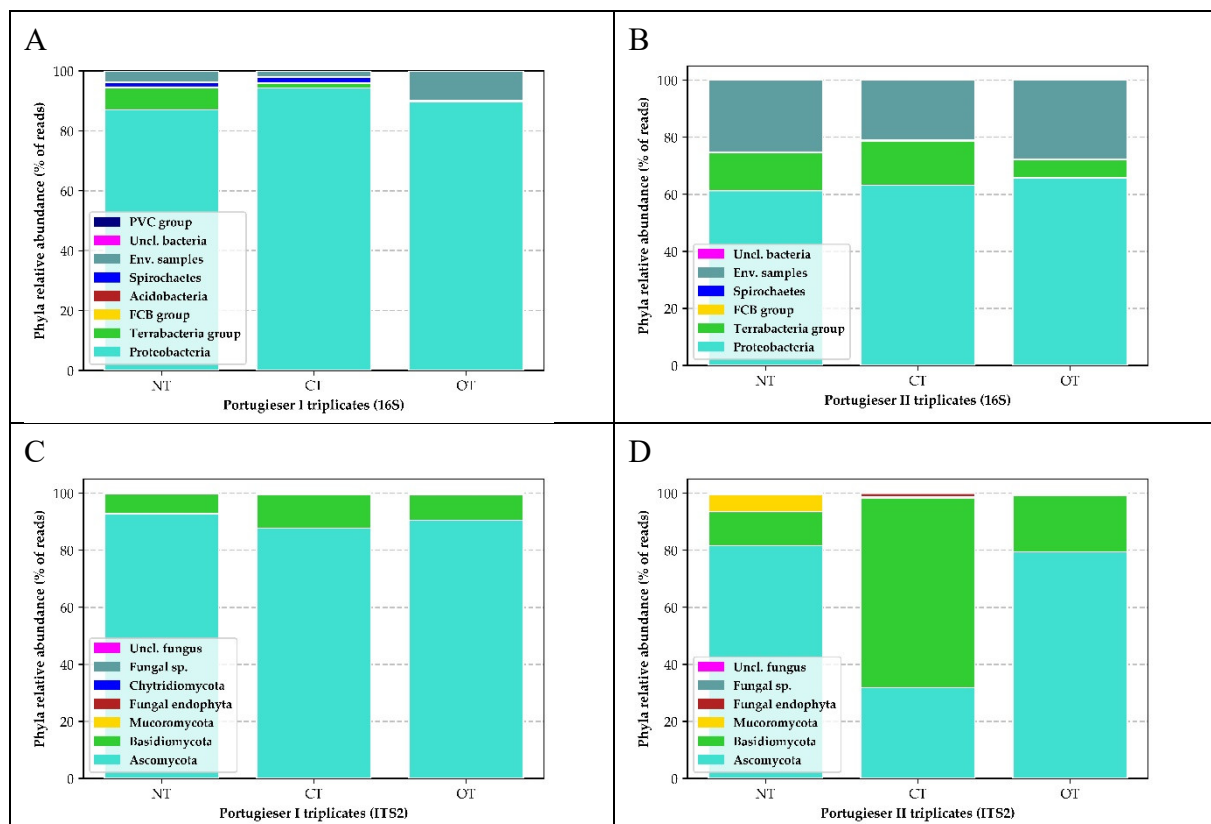

**Figure S5:** Relative abundance of phyla in Portugieser I and Portugieser II samples expressed in % of the bacterial 16S reads (A, B) and % of the fungal ITS2 reads (C, D). Values derived from sample triplicates after merging and subsampling.

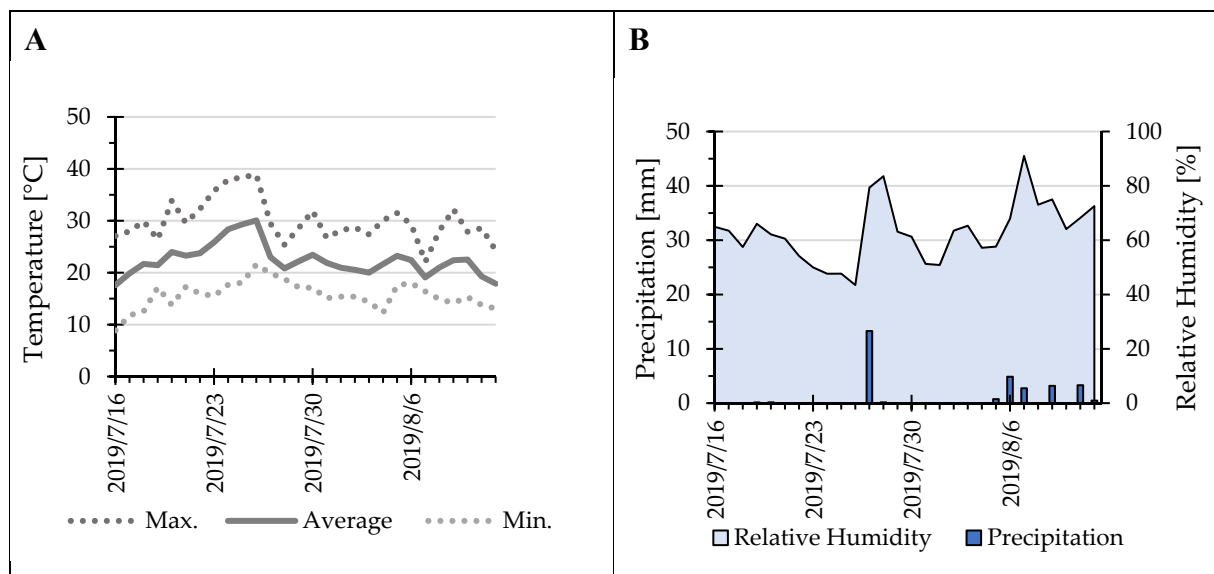

**Figure S6:** Weather data obtained from the weather station Neustadt (Weinstraße, Rhineland-Palatinate, DE). Source of the daily measures of maximum, average and minimum temperatures (A), precipitation and relative humidity (B) is the government platform Agrarmeteorologie Rheinland-Pfalz ([www.Wetter.RLP.de](http://www.Wetter.RLP.de) (accessed on 29 March 2022)).
